# Supplementary material for: Organic Wastes Amended with Sorbents Reduce N2O Emissions from Sugarcane Cropping
Source: MDPI journal article supplement (doi:10.3390/environments8080078), 2021-08-10
Supplement: s1 [file s1]

**Supplementary Table S1:** Soil properties (mean  $\pm$  SD) of the top 10 cm of the study plots at the commercial sugarcane farm at Maroochy River prior to the start of the field experiment.

|                                                        |        |                  |
|--------------------------------------------------------|--------|------------------|
| Soil texture                                           | Sand % | 50               |
|                                                        | Silt % | 27.5             |
|                                                        | Clay % | 22.5             |
| Bulk density, row ( $\text{g cm}^{-3}$ )               |        | 1.00             |
| Bulk density, inter-row ( $\text{g cm}^{-3}$ )         |        | 1.07             |
| pH                                                     |        | $5.27 \pm 0.39$  |
| EC ( $\mu\text{S cm}^{-1}$ )                           |        | $13.08 \pm 3.75$ |
| CEC ( $\text{cmol kg}^{-1}$ )                          |        | $36.81 \pm 1.22$ |
| Total C (%)                                            |        | $2.04 \pm 0.08$  |
| Total N (%)                                            |        | $0.19 \pm 0.01$  |
| Total P (%)                                            |        | $0.03 \pm 0.00$  |
| Total K (%)                                            |        | $0.41 \pm 0.03$  |
| $\text{NH}_4^+\text{-N}$ ( $\text{mg N kg}^{-1}$ soil) |        | $6.80 \pm 6.79$  |
| $\text{NO}_3^-\text{-N}$ ( $\text{mg N kg}^{-1}$ soil) |        | $0.92 \pm 0.86$  |
| Microbial biomass N ( $\text{mg kg}^{-1}$ soil)        |        | $0.56 \pm 0.83$  |

**Supplementary Table S2:** Physical and chemical properties of the poultry litter and amendments used in the field trial. Data are means of 3 replicates  $\pm$  SD; <d.l. below detection limit.

|                                                    | Poultry litter   | Bentonite        | Biochar          | Compost           |
|----------------------------------------------------|------------------|------------------|------------------|-------------------|
| Dry matter (%)                                     | 79.40            | n/a              | n/a              | 66.90             |
| pH                                                 | $8.39 \pm 0.06$  | $8.85 \pm 0.01$  | $8.78 \pm 0.08$  | $6.96 \pm 0.08$   |
| EC ( $\text{mS cm}^{-1}$ )                         | n/a              | $1.66 \pm 0.04$  | $0.26 \pm 0.09$  | $0.57 \pm 0.08$   |
| CEC ( $\text{cmolc kg}^{-1}$ )                     | $74.68 \pm 7.19$ | $76.81 \pm 2.27$ | $39.04 \pm 3.10$ | $52.02 \pm 2.19$  |
| Total C (%)                                        | $37.70 \pm 1.69$ | $0.66 \pm 0.04$  | $25.89 \pm 4.89$ | $17.72 \pm 0.39$  |
| Total N (%)                                        | $3.05 \pm 0.10$  | $0.04 \pm 0.01$  | $0.75 \pm 0.18$  | $1.19 \pm 0.01$   |
| C/N ratio                                          | 12.35            | n/a              | 34.43            | 14.87             |
| Total P (%)                                        | $0.77 \pm 0.15$  | $0.03 \pm 0.00$  | $0.01 \pm 0.00$  | $0.20 \pm 0.01$   |
| Total K (%)                                        | $0.94 \pm 0.07$  | $0.39 \pm 0.21$  | $0.10 \pm 0.01$  | $0.50 \pm 0.04$   |
| $\text{NH}_4^+\text{-N}$ ( $\text{mg N kg}^{-1}$ ) | $2836 \pm 48$    | $7.98 \pm 5.44$  | <d.l.            | $9.23 \pm 7.37$   |
| $\text{NO}_3^-\text{-N}$ ( $\text{mg N kg}^{-1}$ ) | <d.l.            | <d.l.            | $13.20 \pm 3.27$ | $350.6 \pm 103.9$ |
